# Supplementary material
Source: publisher figshare collection journal article supplement (https://acs.figshare.com/ndownloader/files/4318870)
Supplement: Supplementary file 1 [file 4318870]

# Supporting Information

## Nitroxide-mediated Copolymerization of MMA with Styrene – Sequence

### Analysis of Oligomers by Using Mass Spectrometry

*Inga C. Wienhöfer, Heinrich Luftmann and Armido Studer\**

Institute of Organic Chemistry, Department of Chemistry, University of Muenster,  
Corrensstraße 40, 48149 Münster, Germany.

## 1. Mass spectra

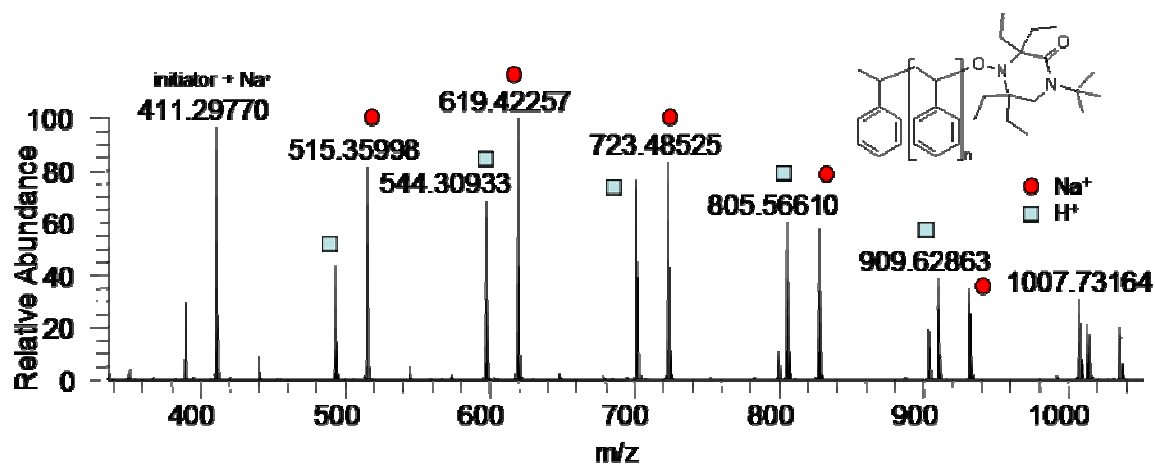

**Figure 1.** ESI spectrum: H<sup>+</sup> and Na<sup>+</sup> addition series of styrene oligomers.

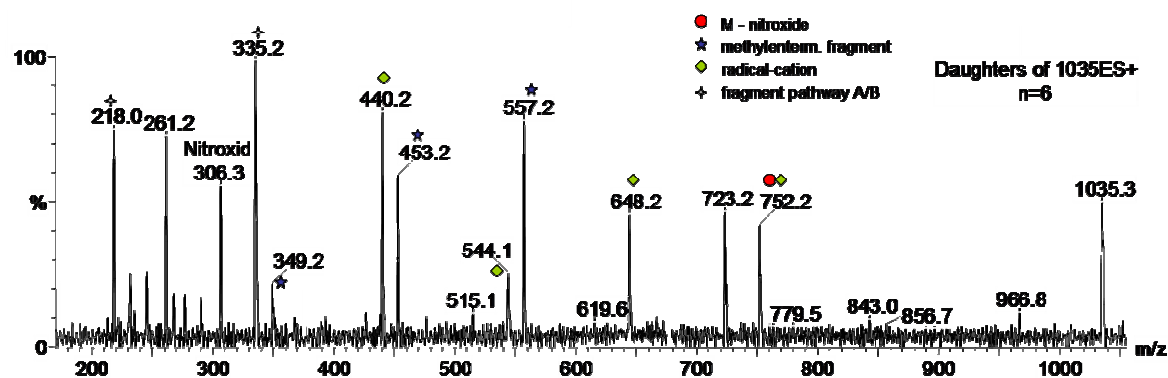

Figure 2. MS<sup>2</sup>-Quattro spectra, styrene oligomer with  $n = 6$  ( $m/z = 1035$ ).

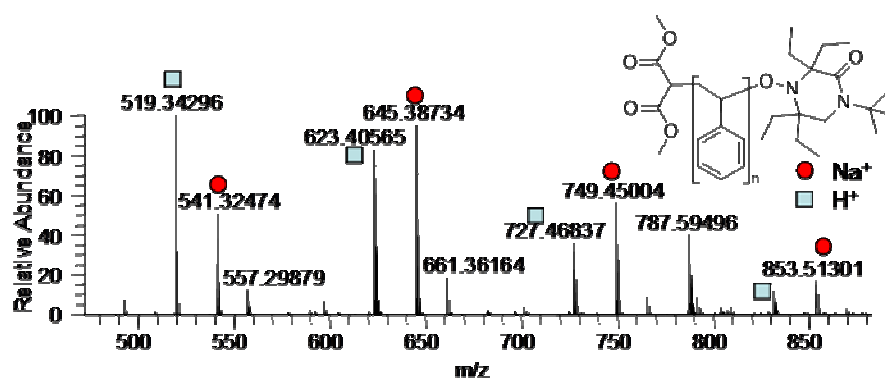

Figure 3. ESI spectrum:  $H^+$ - and  $Na^+$ -addition series of styrene oligomers regulated by initiator 3.

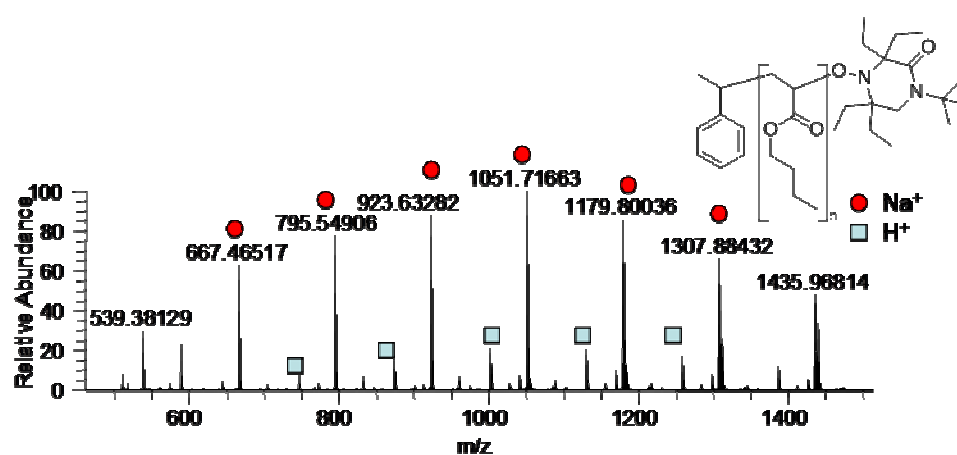

Figure 4. ESI spectrum:  $H^+$ - and  $Na^+$ -addition series of the  $n$ -butyl acrylate oligomers.

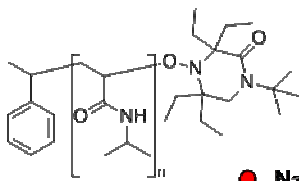

**Figure 5.** ESI spectrum:  $\text{H}^+$ - and  $\text{Na}^+$ -addition series of NIPAM oligomers.

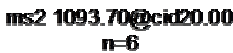

**Figure 6.** ESI spectrum: CID-fragmentation of cooligomer with  $n = 6$  ( $m/z = 1094$ ,  $H^+$ -addition).

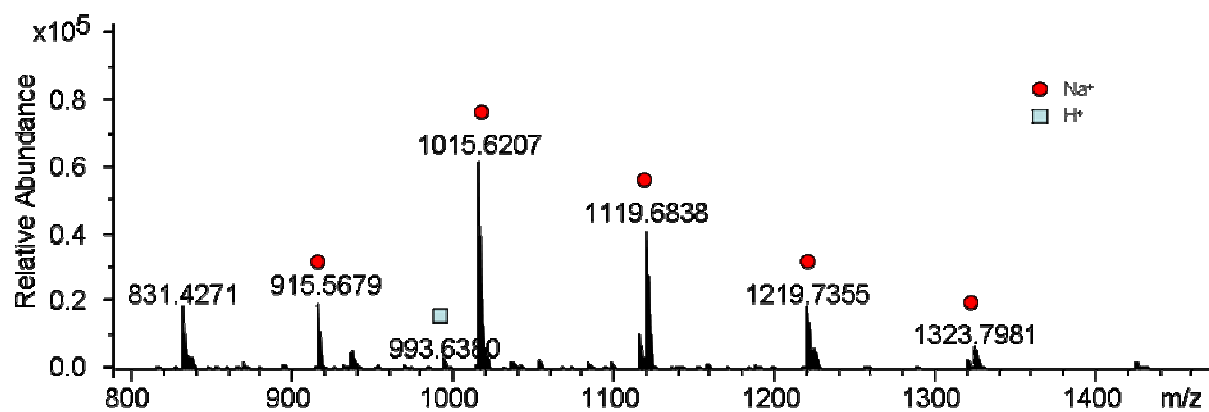

**Figure 7.** ESI spectra: Series of  $\text{Na}^+$ -addition to cooligomers.

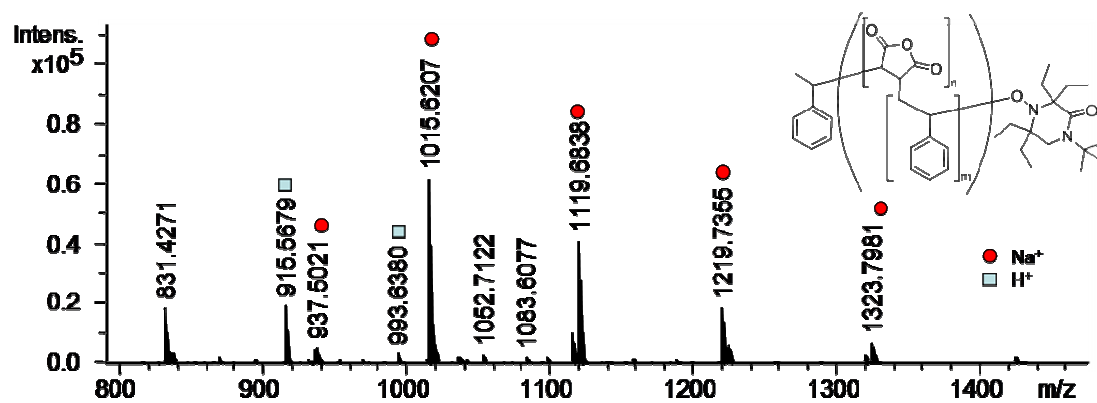

**Figure 8** ESI spectrum:  $\text{H}^+$ - and  $\text{Na}^+$ -addition series of alternating cooligomers.

## 2. SEC Curve

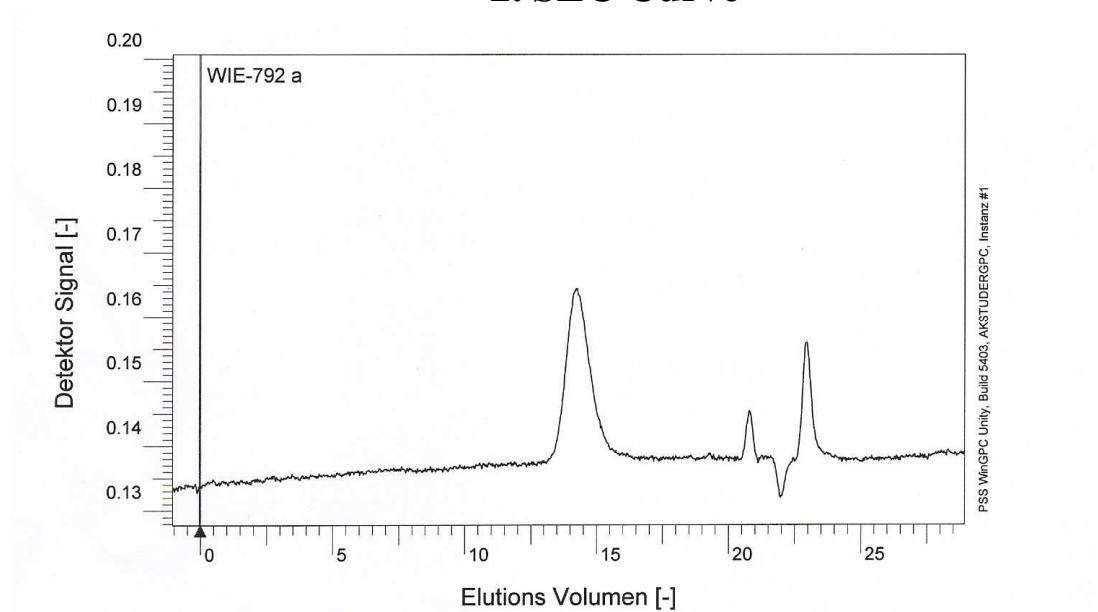

**Figure 9.** SEC curve resulting from chain extension experiment (see Entry 1, Table 2):
